# Supplementary material for: Interdependent IL-7 and IFN-γ signalling in T-cell controls tumour eradication by combined α-CTLA-4+α-PD-1 therapy
Source: PubMed Central journal article supplement (PMC4979067; doi:10.1038/ncomms12335), 2016-08-08
Supplement: ncomms12335-s1.pdf [file ncomms12335-s1.pdf]

## Supplementary Fig. 1

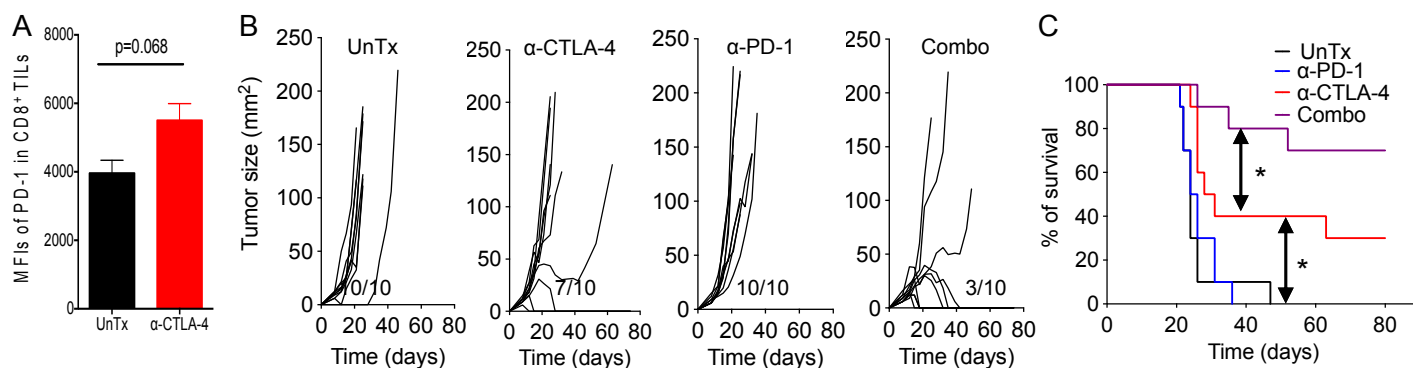

**Supplementary Figure 1.** PD-1 expression on CD8<sup>+</sup> TILs and synergistic effects of combination therapy of  $\alpha$ -CTLA-4 and  $\alpha$ -PD-1 in RENCA tumor rejection. (A) PD-1 expression on CD8<sup>+</sup> TILs isolated from MB49 tumor-bearing mice untreated (UnTx) or treated with  $\alpha$ -CTLA-4. (B-C) Mice bearing 8 days palpable RENCA tumors were left untreated (UnTx) or treated with  $\alpha$ -CTLA-4,  $\alpha$ -PD-1, or combination of both (Combo). (B) Individual tumor growth. Tumor size is presented as length x width (mm<sup>2</sup>) and ratios of tumor-growing mice in each group are shown in the insets on each panel. (C) Survival curves are shown from one representative experiment. Figures represent 1 of 3 independent experiments. \*,  $p < 0.05$  by Log-rank (Mantel-Cox) test.

## Supplementary Fig. 2

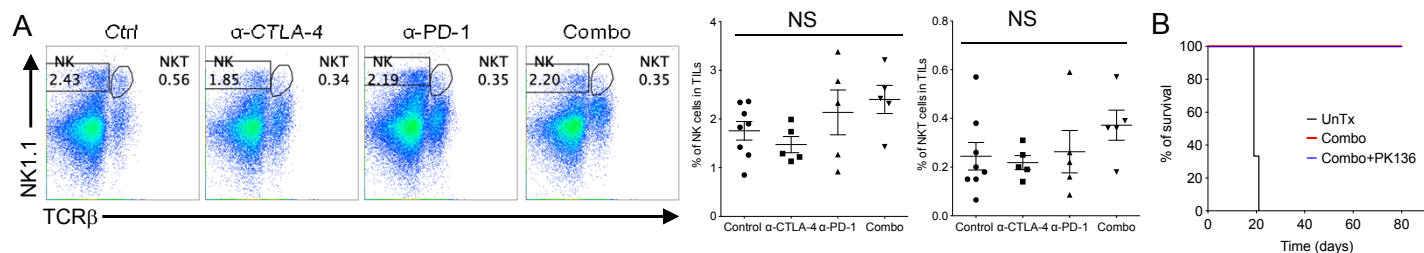

**Supplementary Figure 2.** NK and NKT cells are not required for rejection of MB49 tumor by combination therapy. (A) Proportions of NK and NKT cells in isolated TILs as described in **Figure 3**. Scatter plots indicate pooled results from multiple mice. (B) Control mice or mice depleted of NK1.1<sup>+</sup> cells (PK136) were treated with combo and mouse survivals are presented. Data are means  $\pm$  SEM of 5 mice in each group. NS, no statistical significance by one-way ANOVA with Bonferroni's *post hoc* test. Data are representative of two independent experiments.

### Supplementary Fig. 3

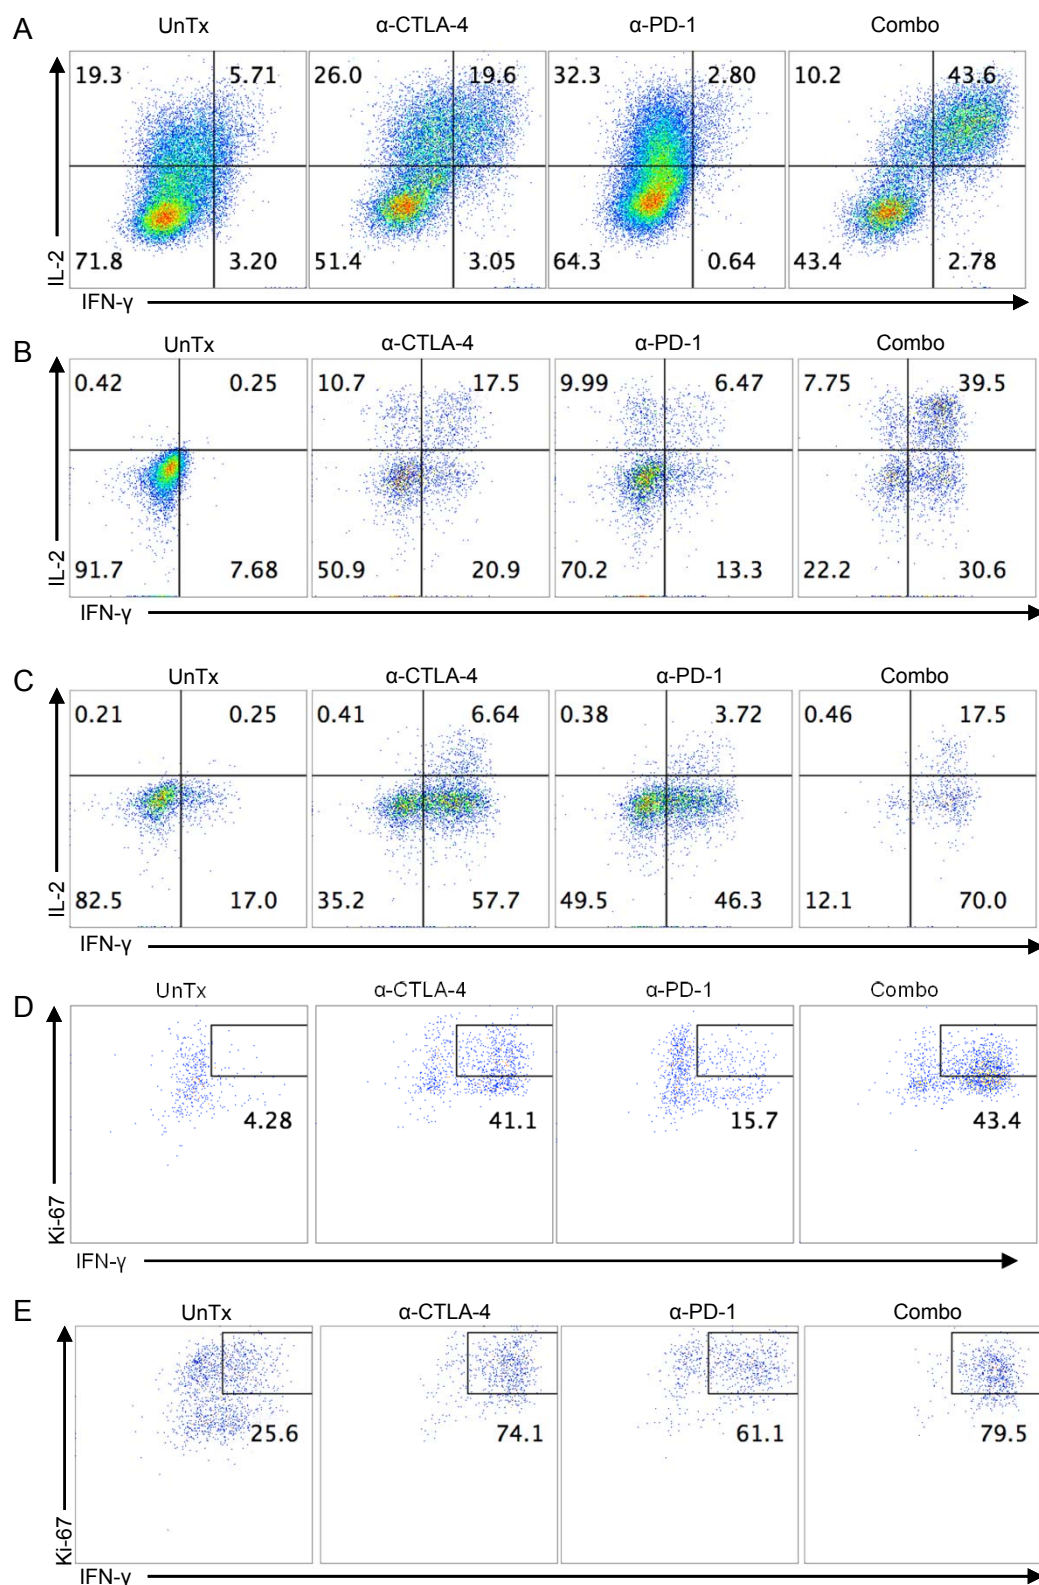

**Supplementary Figure 3.** Combination therapy boosts polyfunctionality of TILs. (A) Purified CD8<sup>+</sup> TILs described as in Fig. 3 co-cultured with irradiated MB49 cells and splenic dendritic cells for 18 h *in vitro* were analyzed for intracellular IL-2 and IFN- $\gamma$ . (B-E) total TILs from tumor-bearing mice treated with  $\alpha$ -CTLA-4-,  $\alpha$ -PD-1-, or combo were briefly stimulated with PMA and ionomycin *in vitro*, and production of IFN- $\gamma$  and IL-2 in CD4<sup>+</sup> (B) or in CD8<sup>+</sup> (C), as well as expression of IFN- $\gamma$  and Ki-67 in CD4<sup>+</sup> (D) or CD8<sup>+</sup> (E) were analyzed by flow cytometry. Data are representative of two independent experiments.

## Supplementary Fig. 4

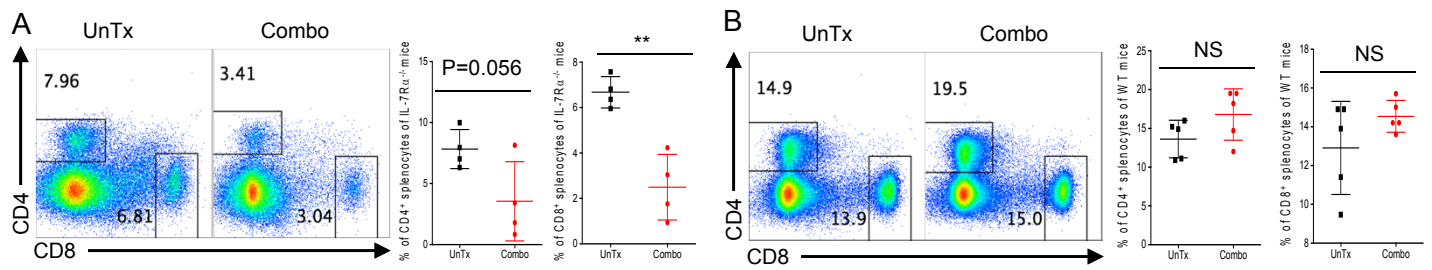

**Supplementary Figure 4.** Combination therapy reduces frequencies of splenic T cells in *Il7r<sup>-/-</sup>* tumor-bearing mice. Frequencies of CD4<sup>+</sup> and CD8<sup>+</sup> T cells in the spleens of tumor-bearing *Il7r<sup>-/-</sup>* (A) and WT (B) mice that were untreated (UnTx) or treated with combination therapy (Combo). Pooled results from 4 or 5 mice are shown by the scatter dot plots. Data are means  $\pm$  SEM. NS, no statistical significance; \*\*,  $p < 0.01$  by two-tailed unpaired Student's *t*-test. Data are representative of two experiments.

## Supplementary Fig. 5

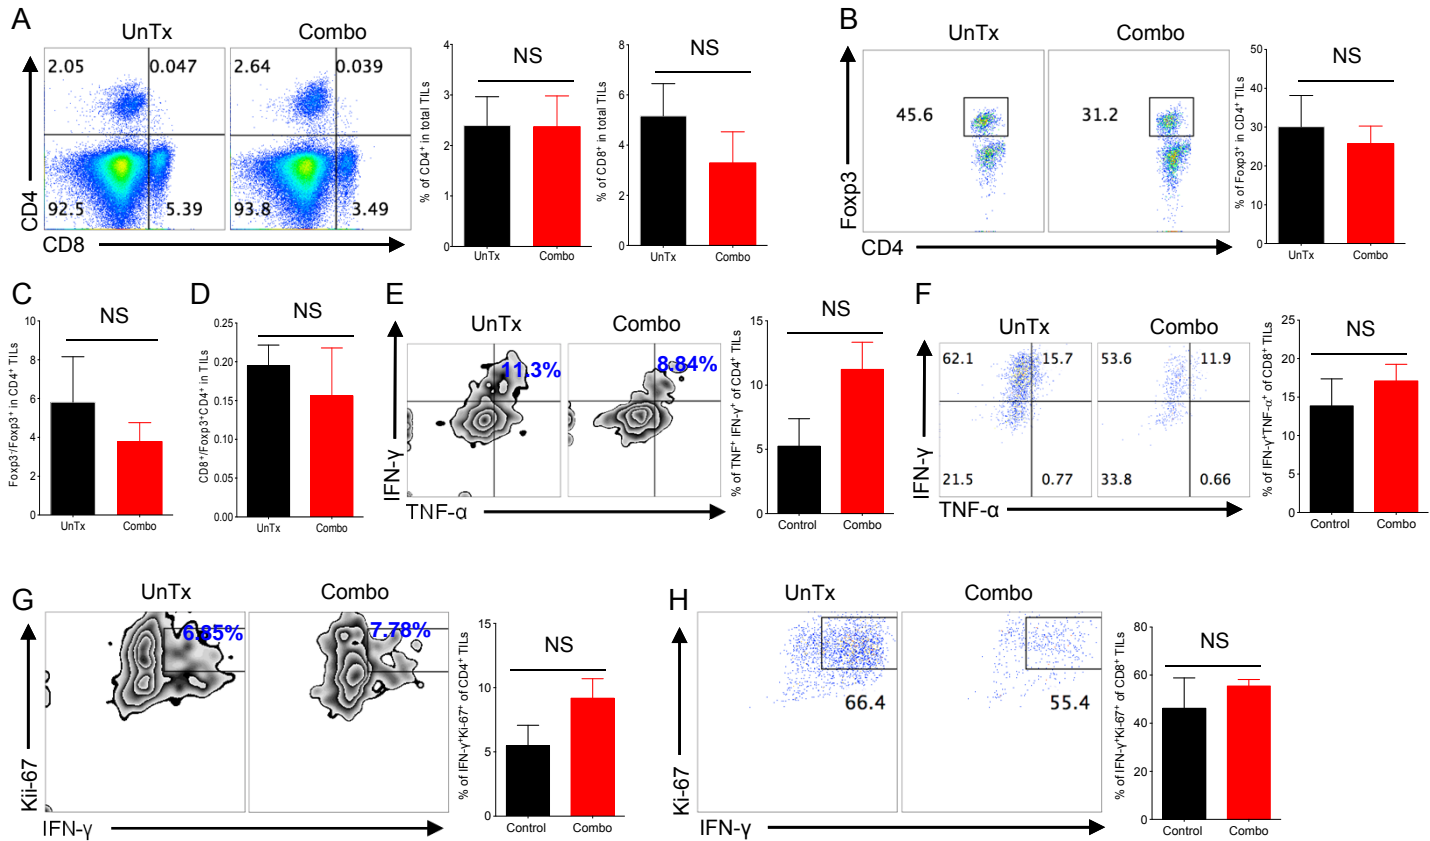

**Supplementary Figure 5.** IFN- $\gamma$  signaling is required for combination therapy-induced immune responses. Freshly isolated TILs from *Ifngr1*<sup>-/-</sup> MB49 tumor-bearing mice untreated (UnTx) or treated with combination therapy (Combo) were directly examined for (A) CD4<sup>+</sup> and CD8<sup>+</sup> T cell infiltration, (B) Proportions of Foxp3<sup>+</sup> T<sub>reg</sub> among CD4<sup>+</sup> TILs, (C) Foxp3<sup>+</sup>/Foxp3<sup>-</sup> ratios of CD4<sup>+</sup> TILs, and (D) CD8<sup>+</sup>/Foxp3<sup>+</sup>CD4<sup>+</sup> ratios. Production of IFN- $\gamma$  and TNF- $\alpha$  by CD4<sup>+</sup> (E) or CD8<sup>+</sup> (F) TILs, or expression of Ki-67 and IFN- $\gamma$  of CD4<sup>+</sup> (G) or CD8<sup>+</sup> TILs (H) was assessed after a brief stimulation with PMA and ionomycin. Data are means  $\pm$  SEM of 5 mice in each group. NS, no statistical significance by two-tailed unpaired Student's *t*-test. Data are representative of two independent experiments.

Supplementary Fig. 6

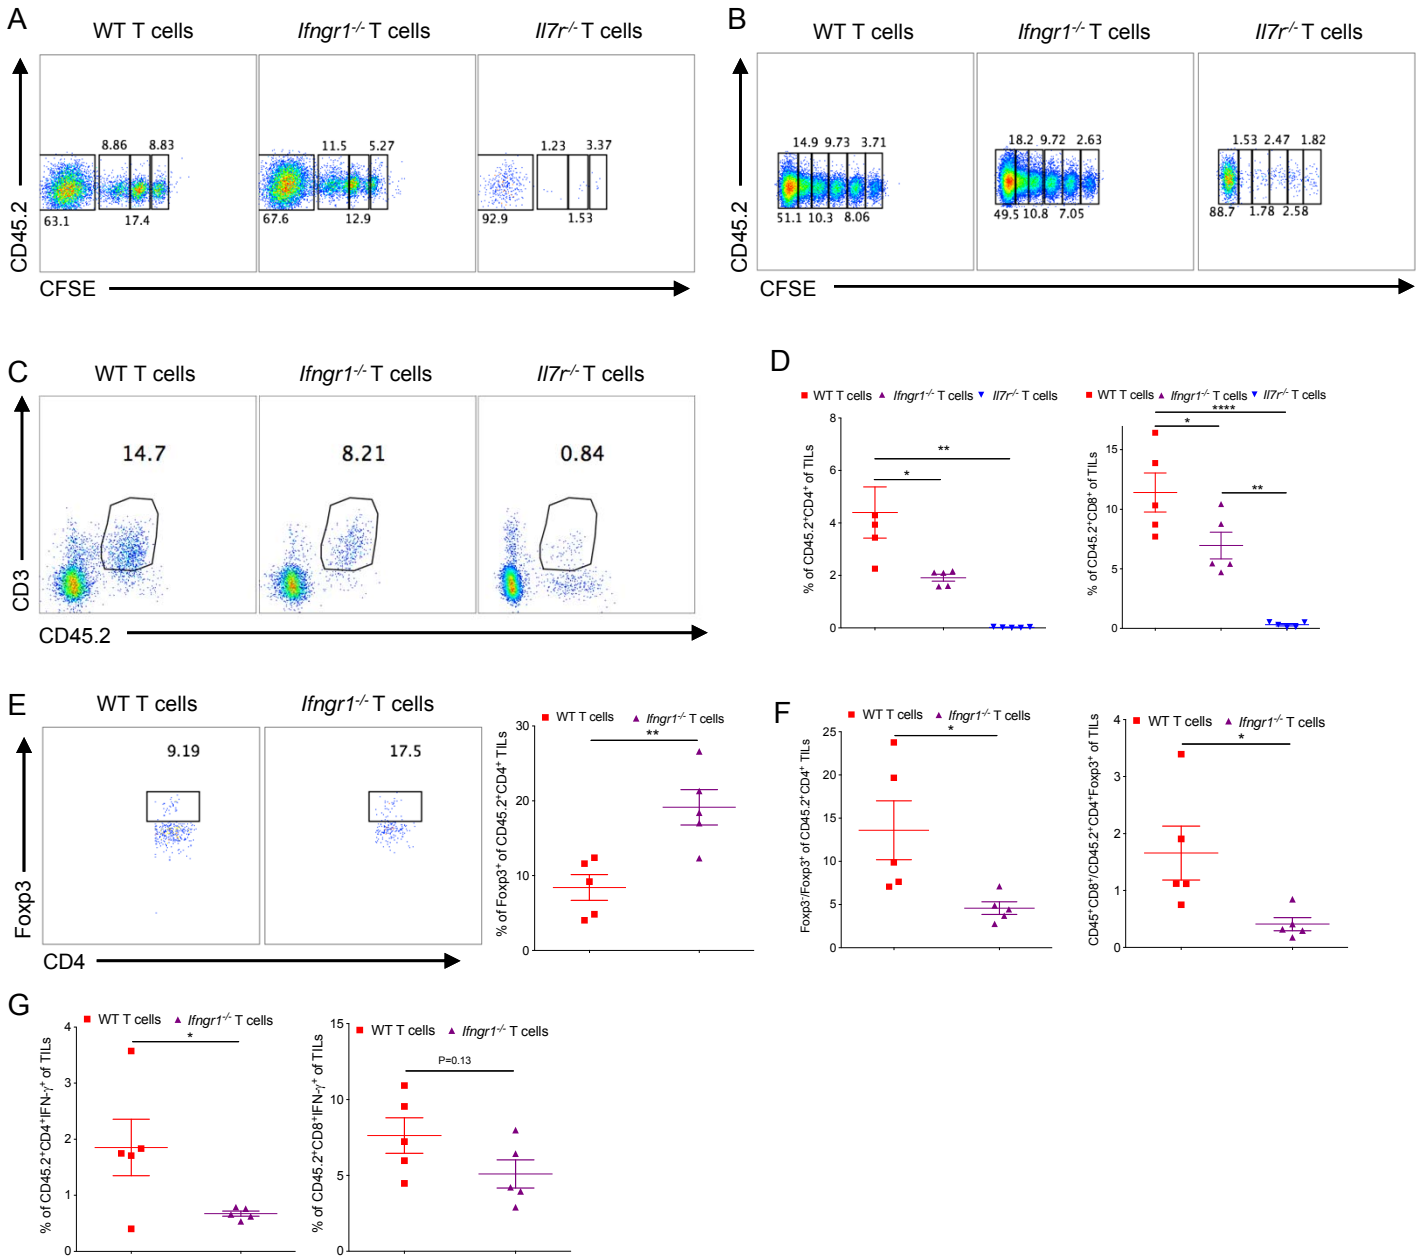

**Supplementary Figure 6.** IFN- $\gamma$  and IL-7 signaling in T cells is required for combination therapy-boosted antitumor immunity. CFSE-labeled purified WT, *Ifngr1*<sup>-/-</sup>, or *Il7r*<sup>-/-</sup> total T cells, congenically marked with CD45.2 were transferred into sublethally irradiated CD45.1 mice, followed by MB49 tumor inoculation and combination therapy. (A-B) CFSE dilution in the CD45.2<sup>+</sup>CD4<sup>+</sup> (A) and CD45.2<sup>+</sup>CD8<sup>+</sup> (B) splenocytes. Numbers adjacent to gates indicate %. (C) Abundance of transferred T cells (CD45.2<sup>+</sup>CD3<sup>+</sup>) in TILs. (D) Frequencies of transferred CD45.2<sup>+</sup>CD4<sup>+</sup> and CD8<sup>+</sup> T cells in TILs. (E) Proportions of T<sub>reg</sub> among CD45.2<sup>+</sup>CD4<sup>+</sup> TILs. Pooled results are presented in the scatter dot plots. (F) Ratios of Foxp3<sup>3-</sup>/Foxp3<sup>+</sup> in CD45.2<sup>+</sup>CD4<sup>+</sup> TILs or CD45.2<sup>+</sup>CD8<sup>+</sup>/CD45.2<sup>+</sup>CD4<sup>+</sup>Foxp3<sup>+</sup>CD4<sup>+</sup> of TILs. (G) Percentages of CD45.2<sup>+</sup>CD4<sup>+</sup>IFN- $\gamma$ <sup>+</sup> or CD45.2<sup>+</sup>CD8<sup>+</sup>IFN- $\gamma$ <sup>-</sup> among total TILs. Data are means  $\pm$  SEM of 5 mice in each group. \*, p<0.05; \*\*, p<0.01; \*\*\*\*, p<0.0001 by one-way ANOVA with Bonferroni's *post hoc* test (D) or two-tailed unpaired Student's *t*-test (E-G). Data are representative of two independent experiments.

## Supplementary Fig. 7

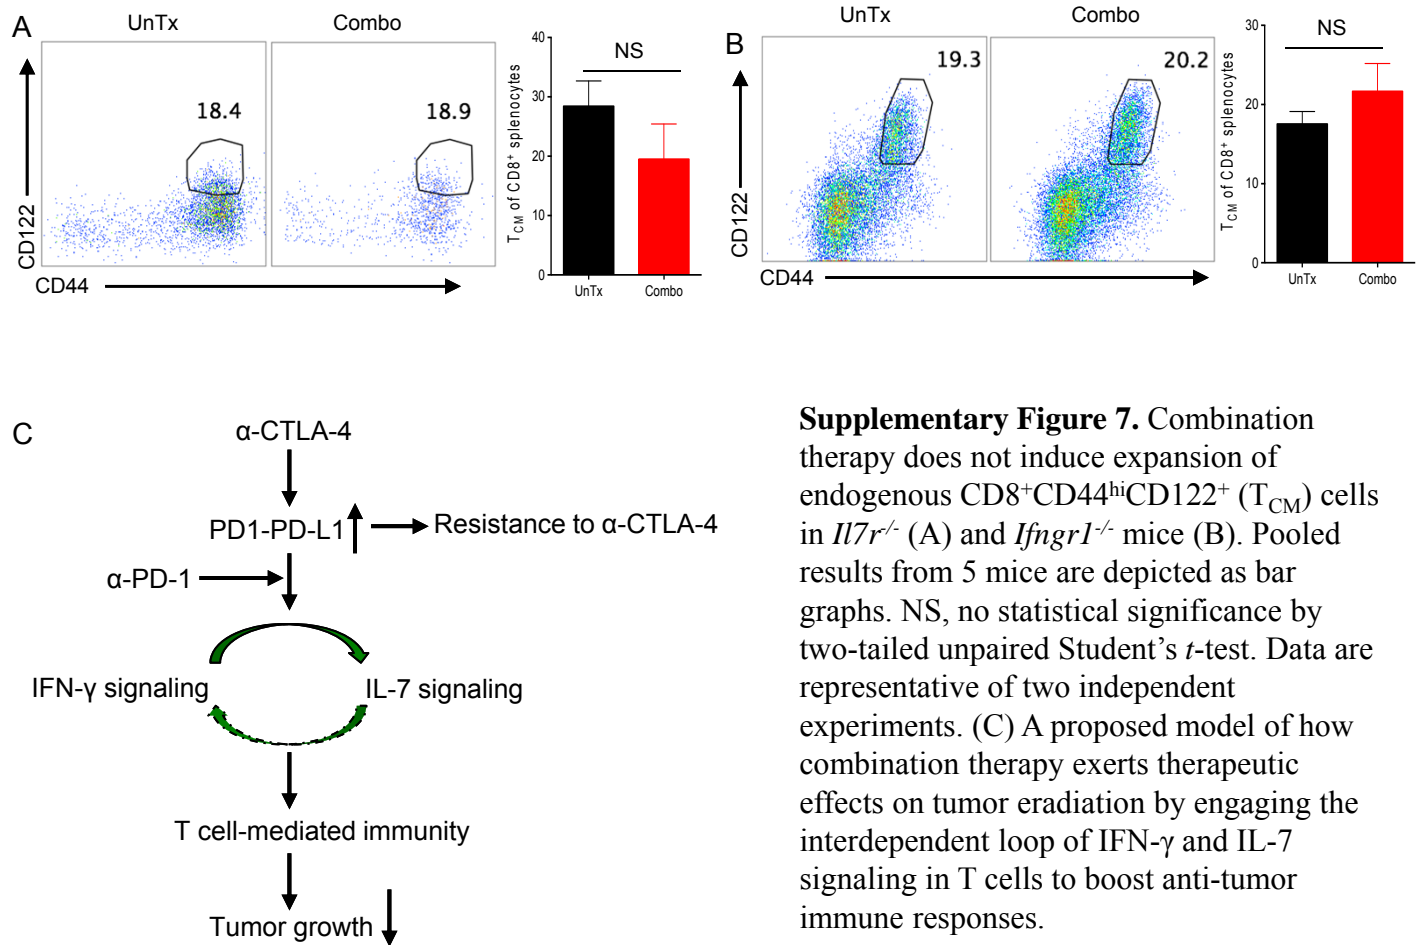

**Supplementary Figure 7.** Combination therapy does not induce expansion of endogenous CD8<sup>+</sup>CD44<sup>hi</sup>CD122<sup>+</sup> ( $T_{CM}$ ) cells in *Il7r*<sup>-/-</sup> (A) and *Ifngr1*<sup>-/-</sup> mice (B). Pooled results from 5 mice are depicted as bar graphs. NS, no statistical significance by two-tailed unpaired Student's *t*-test. Data are representative of two independent experiments. (C) A proposed model of how combination therapy exerts therapeutic effects on tumor eradication by engaging the interdependent loop of IFN- $\gamma$  and IL-7 signaling in T cells to boost anti-tumor immune responses.
